# Supplementary material for: Prognostic Performance of Existing Scoring Systems among Critically Ill Patients Requiring Continuous Renal Replacement Therapy: An Observational Study
Source: J Clin Med. 2021 Oct 6;10(19):4592. doi: 10.3390/jcm10194592 (PMC8509572; doi:10.3390/jcm10194592)
Supplement: Supplementary file 1 [file jcm-10-04592-s001.zip › jcm-1398366-supplementary.pdf]

## Supplementary Materials

**Supplemental Table S1.** Performance of the scoring systems on day 1 of CRRT initiation in predicting 3-day mortality in the entire cohort and in patients older than 80 years

| Score      | Total cohort                    |                                     |                    | Cohort with octogenarian (Age ≥80 years) |                                   |                    |
|------------|---------------------------------|-------------------------------------|--------------------|------------------------------------------|-----------------------------------|--------------------|
|            | Survivor<br>( <i>n</i> = 2,119) | Non-survivor<br>( <i>n</i> = 1,251) | AUC (95% CI)       | Survivor<br>( <i>n</i> = 321)            | Non-survivor<br>( <i>n</i> = 237) | AUC (95% CI)       |
| SOFA       | 14.3 ± 3.4                      | 14.9 ± 3.3                          | 54.7 (52.7 - 56.7) | 13.1 ± 3.2                               | 13.9 ± 3.2                        | 56.3 (51.5 - 61.1) |
| qSOFA      | 1.9 ± 0.8                       | 2.1 ± 0.8                           | 56.1 (54.2 - 57.9) | 2.0 ± 0.8                                | 2.0 ± 0.8                         | 52.4 (47.9 - 56.8) |
| APACHE III | 99.3 ± 28.9                     | 112.1 ± 28.0                        | 62.5 (60.5 - 64.4) | 102.4 ± 27.1                             | 113.6 ± 27.1                      | 62.1 (57.4 - 66.7) |
| MOSAIC     | 19.7 ± 10.6                     | 24.3 ± 11.2                         | 61.5 (59.5 - 63.4) | 16.9 ± 10.3                              | 21.2 ± 10.5                       | 62.1 (57.4 - 66.7) |

CRRT, continuous renal replacement therapy; AUC, area under the curve; CI, confidence interval; SOFA, Sequential Organ Failure Assessment; qSOFA, quick

Sequential Organ Failure Assessment; APACHE, Acute Physiology and Chronic Health Evaluation; MOSAIC, Mortality Scoring system for AKI with CRRT

a: the missing components of the score system were imputed by a score of 0.

**Supplemental Table S2.** The optimal cutoffs and the corresponding sensitivity and specificity in the analysis with an AUC ≥70%.

| Day of mortality | Score      | Day after CRRT      | Cohort    | AUC, % (95% CI)    | Cutoff | Sensitivity, % (95% CI) | Specificity, % (95% CI) |
|------------------|------------|---------------------|-----------|--------------------|--------|-------------------------|-------------------------|
| 7-day            | APACHE III | 3 <sup>rd</sup> day | Total     | 76.1 (73.6 - 78.5) | 107    | 63.8 (59.1 - 68.3)      | 75.0 (72.8 - 77.1)      |
| 7-day            | qSOFA      | 3 <sup>rd</sup> day | ≥80 years | 74.3 (68.8 - 79.7) | 2      | 90.0 (81.9 - 95.3)      | 43.3 (36.5 - 50.2)      |
| 7-day            | APACHE III | 3 <sup>rd</sup> day | ≥80 years | 78.9 (73.1 - 84.8) | 108    | 67.8 (57.1 - 77.3)      | 78.6 (72.5 - 83.9)      |
| ICU              | SOFA       | 7 <sup>th</sup> day | Total     | 74.1 (71.7 - 76.5) | 14     | 67.3 (63.5 - 71.0)      | 67.6 (64.5 - 70.6)      |
| ICU              | APACHE III | 7 <sup>th</sup> day | Total     | 74.7 (72.3 - 77.1) | 82     | 65.5 (61.6 - 69.3)      | 71.0 (67.9 - 73.9)      |
| ICU              | MOSAIC     | 7 <sup>th</sup> day | Total     | 71.3 (68.8 - 73.9) | 10     | 77.6 (74.1 - 80.9)      | 54.0 (50.7 - 57.2)      |
| ICU              | SOFA       | 7 <sup>th</sup> day | ≥80 years | 75.4 (68.9 - 81.8) | 13     | 70.2 (59.3 - 79.7)      | 70.4 (61.6 - 78.2)      |
| ICU              | APACHE III | 7 <sup>th</sup> day | ≥80 years | 72.6 (65.8 - 79.3) | 85     | 65.5 (54.3 - 75.5)      | 71.2 (62.4 - 79.0)      |

|             |            |                     |           |                    |    |                    |                    |
|-------------|------------|---------------------|-----------|--------------------|----|--------------------|--------------------|
| ICU         | MOSAIC     | 7 <sup>th</sup> day | ≥80 years | 74.2 (67.5 - 80.9) | 13 | 60.7 (49.4 - 71.2) | 78.4 (70.2 - 85.3) |
| In-hospital | SOFA       | 7 <sup>th</sup> day | Total     | 71.8 (69.3 - 74.3) | 12 | 78.9 (75.8 - 81.8) | 51.6 (48.1 - 55.1) |
| In-hospital | APACHE III | 7 <sup>th</sup> day | Total     | 73.5 (71.0 - 76.0) | 75 | 69.9 (66.4 - 73.2) | 64.9 (61.5 - 68.2) |
| In-hospital | SOFA       | 7 <sup>th</sup> day | ≥80 years | 73.2 (66.5 - 79.8) | 13 | 63.3 (53.5 - 72.3) | 73.0 (63.2 - 81.4) |
| In-hospital | APACHE III | 7 <sup>th</sup> day | ≥80 years | 70.7 (63.7 - 77.7) | 82 | 65.1 (55.4 - 74.0) | 67.0 (56.9 - 76.1) |
| In-hospital | MOSAIC     | 7 <sup>th</sup> day | ≥80 years | 74.7 (67.9 - 81.4) | 9  | 77.1 (68.0 - 84.6) | 62.0 (51.8 - 71.5) |

AUC, area under the curve; CRRT, continuous renal replacement therapy; CI, confidence interval; ICU, intensive care unit; SOFA, Sequential Organ Failure

Assessment; qSOFA, quick Sequential Organ Failure Assessment; APACHE, Acute Physiology and Chronic Health Evaluation; MOSAIC, Mortality Scoring system for AKI with CRRT.
